# Supplementary material for: Piscirickettsia salmonis Imbalances the Innate Immune Response to Succeed in a Productive Infection in a Salmonid Cell Line Model
Source: PubMed Central journal article supplement (PMC5056700; doi:10.1371/journal.pone.0163943), 2016-10-10
Supplement: pone.0163943.s001.pdf [file pone.0163943.s001.pdf]

## S1 Figure

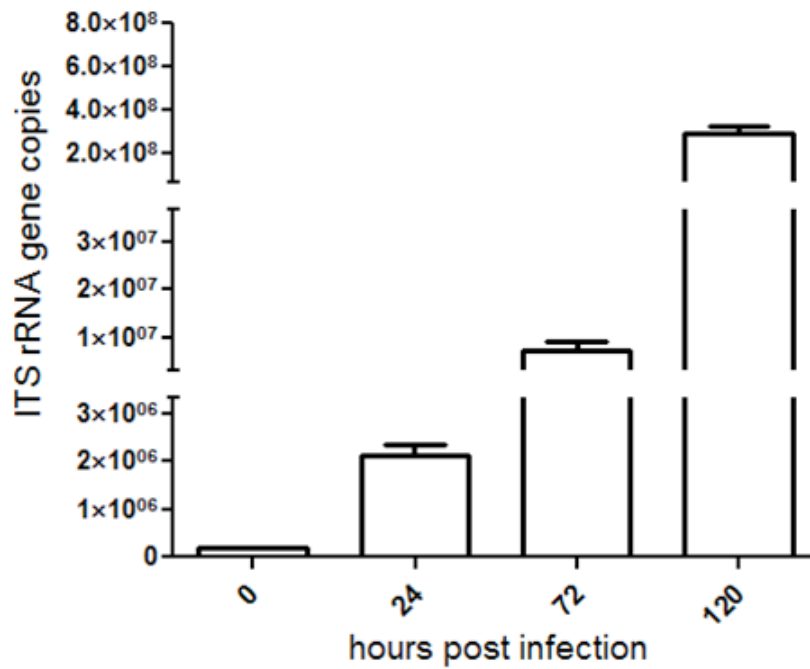

### S1 Fig. Quantification of *P. salmonis* in RTS-11 line cell.

In order to corroborate a productive infection in RTS11 cells, was made an infection to determine the increase of bacterial number in time. For this purpose 6 well plates of RTS11 cells (6 million of cell per well) were infected with *P. salmonis* (inoculum of  $2 \times 10^4$  bacteria/ml), making an infection kinetic of 24, 72 and 120 hours (all in duplicated). Bacterial multiplication was measured by qPCR using absolute quantification, using the ITS (16S-23S intergenic spacer) as has been describer previously (Olivares and Marshall, 2010). These results are shown that the bacterial number increases 1 log since the initial inoculum.
