# Supplementary material for: Piscirickettsia salmonis Imbalances the Innate Immune Response to Succeed in a Productive Infection in a Salmonid Cell Line Model
Source: PubMed Central journal article supplement (PMC5056700; doi:10.1371/journal.pone.0163943), 2016-10-10
Supplement: pone.0163943.s002.pdf [file pone.0163943.s002.pdf]

**S1 File**

**A**

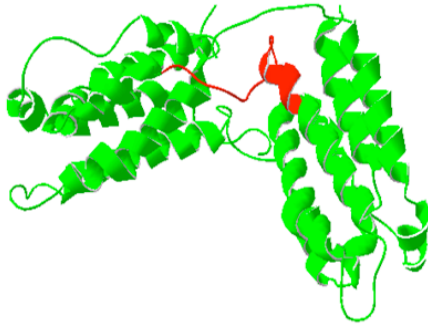

**B**

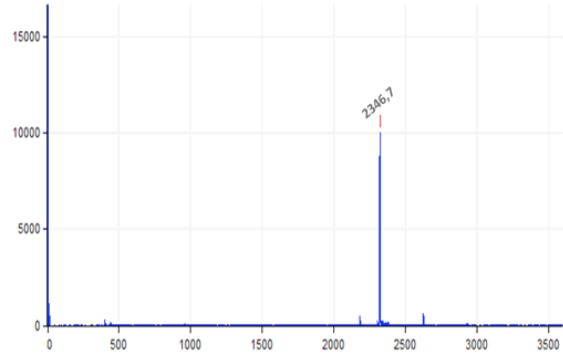

**C**

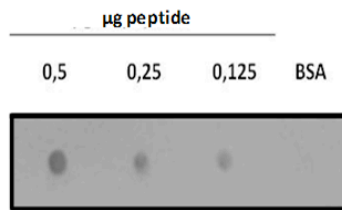

**D**

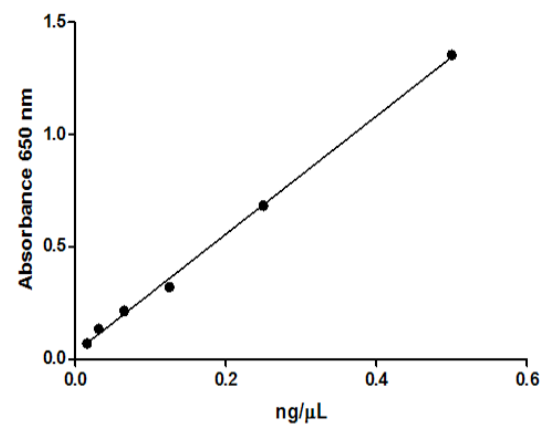

**S1 File: Antigenic peptide and antisera production against trout IL-10.**
