# Supplementary material for: Piscirickettsia salmonis Imbalances the Innate Immune Response to Succeed in a Productive Infection in a Salmonid Cell Line Model
Source: PubMed Central journal article supplement (PMC5056700; doi:10.1371/journal.pone.0163943), 2016-10-10
Supplement: pone.0163943.s003.pdf [file pone.0163943.s003.pdf]

**S1 Table. Primer sequences used in this study**

| <b>Molecule</b>             | <b>Primer</b> | <b>Sequence</b>             | <b>Ref.</b> |
|-----------------------------|---------------|-----------------------------|-------------|
| Interleukin 12              | IL-12Fw       | CCCAACACGGACAGGAACAC        | [35]        |
|                             | IL-12Rev      | GCCCTTCAGTAACTTACACAGATGGAC |             |
| Interleukin 10              | IL-10Fw       | GCCCTTCAGTAACTTACACAGATGGAC | [36]        |
|                             | IL-10Rev      | GTCGTTGTTGTTCTGTGTTCTGTTGT  |             |
| Cathepsin D                 | CatDFw        | GCCTGTCATCACATTCAACCT       | [34]        |
|                             | CatDRev       | CCACTCAGGCAGATGGTCTTA       |             |
| Hepcidin                    | HepFw         | CCACTCAGGCAGATGGTCTTA       | [33]        |
|                             | HepRev        | TTATTGCAGGCAGGTTCT          |             |
| Guanylate-binding protein 1 | GBP1Fw        | CGTCAATCAGCTGTCAGAGAACCA    | This study  |
|                             | GBP1Rev       | TCGGAGGCATCCTTGTTCTGTTG     |             |
| elongation factor 1 alpha   | Elf1aFw       | GTCTACAAAATCGGCGGTAT        | [38]        |
|                             | Elf1aRev      | CTTGACGGACACGTTCTTGA        |             |
